# Supplementary material for: Can theoretical methods go beyond the experimental data? The case of molecular magnetism
Source: Royal Society of Chemistry journal article supplement (doi:10.1039/b902745a), 2009-01-01
Supplement: b902745a.pdf [file b902745a.pdf]

## Electronic Supplementary Information

**Table S1.** Exchange interaction between manganese cations for complexes employed in the Magnetostructural Maps indicating the refcode in Cambridge Structural Database, the oxidation state, the bridging ligands, the intermetallic distance and the calculated J values.

| Complex    | Oxidation state | Bridging ligands | M···M (Å) | J B3LYP (cm <sup>-1</sup> ) | J PBE (cm <sup>-1</sup> ) | Reference |
|------------|-----------------|------------------|-----------|-----------------------------|---------------------------|-----------|
| Mn4-TAVPAH | II II           | OR-OR            | 3.220     | -4.0                        | -9.1                      | 1         |
| Mn4-TAVNUZ | II II           | OR-OR            | 3.227     | -4.1                        | -9.3                      | 1         |
| Mn4-TAVNUZ | II II           | OR-OR            | 3.227     | -3.8                        | -9.0                      | 1         |
| Mn4-VAFBIO | II II           | OR-OR            | 3.235     | -7.0                        | -17.6                     | 1         |
| Mn4-TAVNUZ | II II           | OR-OR            | 3.239     | -3.5                        | -8.5                      | 1         |
| Mn4-TAVNUZ | II II           | OR-OR            | 3.242     | -3.4                        | -8.0                      | 1         |
| Mn4-TAVPAH | II II           | OR-OR            | 3.246     | -3.3                        | -8.0                      | 1         |
| Mn4-TAVPAH | II II           | OR-OR            | 3.250     | -3.3                        | -7.                       | 1         |
| Mn4-TAVPAH | II II           | OR-OR            | 3.252     | -3.0                        | -6.9                      | 1         |
| Mn2-BEQVAV | II II           | OR-OR            | 3.262     | -4.0                        | -8.2                      | 2         |
| Mn4-YAQXUK | II II           | OR-OR            | 3.274     | -3.2                        | -6.3                      | 1         |
| Mn4-TAVPAH | II II           | OR-OR            | 3.284     | -2.3                        | -8.4                      | 1         |
| Mn4-TAVNUZ | II II           | OR-OR            | 3.297     | -2.0                        | -7.0                      | 1         |
| Mn4-YAQXUK | II II           | OR-OR            | 3.310     | -2.5                        | -4.9                      | 1         |
| Mn4-TAVNUZ | II II           | OR-OR            | 3.318     | -2.0                        | -7.2                      | 1         |
| Mn4-MOFSAB | II II           | OR-OR            | 3.342     | +0.4                        | -0.6                      | 1         |
| Mn4-MOFSAB | II II           | OR-OR            | 3.350     | -1.5                        | -4.2                      | 1         |
| Mn4-TAVPAH | II II           | OR-OR            | 3.352     | -2.0                        | -8.6                      | 1         |
| Mn4-YAQXUK | II II           | OR-OR            | 3.385     | -0.3                        | -1.9                      | 1         |
| Mn4-VAFBIO | II II           | OR-OR            | 3.408     | -5.8                        | -13.6                     | 1         |
| Mn4-YAQXUK | II II           | OR-OR            | 3.432     | -1.0                        | -3.2                      | 1         |
| Mn2-DADQUV | II II           | OR-OR            | 3.443     | +0.9                        | +2.1                      | 2         |
| Mn4-YAQXUK | II II           | OR-OR            | 3.447     | -0.2                        | -1.6                      | 1         |
| Mn4-YAQXUK | II II           | OR-OR            | 3.456     | -1.3                        | -3.9                      | 1         |
| Mn2-QAPWOU | III III         | O-O              | 2.658     | -164.0                      | -200.0                    | 2         |
| Mn4-SAVRIR | III III         | O-O              | 2.750     | -118.0                      | -164.0                    | 1         |
| Mn4-SAVROX | III III         | O-O              | 2.792     | -112.0                      | -153.0                    | 1         |
| Mn4-SUXMIH | III III         | O-O-C            | 2.841     | -58.8                       | -                         | 1         |

|             |         |                    |       |       |       |                      |
|-------------|---------|--------------------|-------|-------|-------|----------------------|
| Mn4-VOFBEX  | III III | O-O-C              | 2.843 | -47.5 | -     | 1                    |
| Mn4-FECFOI  | III III | O-O-C              | 2.846 | -37.5 | -     | 1                    |
| Mn4-LAQYOS  | III III | O-O-C              | 2.871 | -39.7 | -     | 1                    |
| Mn4-KIRNUU  | III III | O-O-C              | 2.875 | -59.7 | -     | 1                    |
| Mn2-WEDPEB  | III III | OR-OR              | 3.084 | +19.1 | +33.8 | 2                    |
| Mn4-VALRUV  | III III | O-OH               | 3.103 | +20.9 | +32.0 | 1                    |
| Mn4-VALRUV  | III III | O-OH               | 3.126 | +22.3 | +29.1 | 1                    |
| Mn4-VALRUV  | III III | O-OH               | 3.137 | +22.3 | +32.8 | 1                    |
| Mn6-REJPEC  | III III | O-ON-C             | 3.143 | -21.0 | -     | 3                    |
| Mn6-VIVFIQ  | III III | ON-ON              | 3.154 | +6.4  | -     | 3                    |
| Mn6-VIVGEN  | III III | O-ON               | 3.176 | +5.0  | -     | <b>6, this work</b>  |
| Mn19-XELCUN | III III | O-N <sub>3</sub>   | 3.185 | +14.2 | +22.2 | 4                    |
| Mn3-TAYCOM  | III III | O-ON-C             | 3.188 | +13.8 | +40.8 | 5                    |
| Mn3-TAYCOM  | III III | O-ON-C             | 3.191 | +14.2 | +45.4 | 5                    |
| Mn4-ZALSUA  | III III | O-OR               | 3.195 | +15.7 | +27.3 | 1                    |
| Mn4-ZALSUA  | III III | O-OR               | 3.196 | +15.2 | +26.9 | 1                    |
| Mn3-TAYCOM  | III III | O-ON-C             | 3.201 | +15.3 | +43.8 | 5                    |
| Mn4-UFAMAP  | III III | O-ONO <sub>2</sub> | 3.201 | +3.0  | +8.9  | 1                    |
| Mn19-XELCUN | III III | O-N <sub>3</sub>   | 3.206 | +11.3 | +16.8 | 4                    |
| Mn4-ZALSUA  | III III | O-OR               | 3.213 | +17.4 | +31.6 | 1                    |
| Mn19-XELCUN | III III | O-N <sub>3</sub>   | 3.219 | +15.2 | +15.7 | 4                    |
| Mn6-VIVGOX  | III III | O-ON               | 3.224 | +5.8  | -     | 3                    |
| Mn4-UFAMAP  | III III | O-ONO <sub>2</sub> | 3.226 | +5.0  | +10.4 | 1                    |
| Mn6-VIVFOW  | III III | ON-ON              | 3.231 | +7.2  | -     | 3                    |
| Mn6-VIVGEN  | III III | O-ON               | 3.232 | +2.4  | -     | <b>6, this work</b>  |
| Mn6-VIVFOW  | III III | O-ON               | 3.232 | +1.6  | -     | 3                    |
| Mn6-VIVGIR  | III III | O-ON               | 3.234 | -3.6  | -     | 3                    |
| Mn6-VIVGIR  | III III | O-ON               | 3.238 | +4.6  | -     | 3                    |
| Mn6-REJPEC  | III III | O-ON               | 3.238 | +2.6  | -     | 3                    |
| Mn10-VEHQEF | III III | O-N <sub>3</sub>   | 3.239 | +15.9 | +23.2 | 4                    |
| Mn6         | III III | O-ON               | 3.240 | +4.2  | -     | <b>14, this work</b> |
| Mn6-VIVFIQ  | III III | O-ON               | 3.241 | -3.0  | -     | 3                    |
| Mn6-CIFJUX  | III III | O-ON               | 3.246 | +8.0  | -     | <b>3, this work</b>  |
| Mn6-CIFJUX  | III III | O-ON               | 3.247 | +1.8  | -     | <b>3, this work</b>  |
| Mn6-CEYMAV  | III III | O-ON               | 3.247 | +5.2  | -     | 3                    |
| Mn6-VIVFOW  | III III | O-ON               | 3.248 | +6.2  | -     | 3                    |
| Mn6-VIVFOW  | III III | O-ON               | 3.250 | -6.8  | -     | 3                    |
| Mn6-VIVFIQ  | III III | O-ON               | 3.251 | +2.4  | -     | 3                    |
| Mn4-SUXMIH  | III III | O-C2               | 3.255 | -7.7  | -     | 1                    |
| Mn6-CIFJUX  | III III | O-ON               | 3.255 | +4.0  | -     | <b>3, this work</b>  |
| Mn6-CEYMAV  | III III | ON-ON              | 3.255 | +6.2  | -     | 3                    |

|             |         |                    |       |       |       |                       |
|-------------|---------|--------------------|-------|-------|-------|-----------------------|
| Mn6-CIFJUX  | III III | O-ON               | 3.255 | -1.4  | -     | <b>3</b> , this work  |
| Mn6-CIFJUX  | III III | O-ON               | 3.257 | -5.6  | -     | <b>3</b> , this work  |
| Mn6         | III III | O-ON               | 3.257 | -1.6  | -     | <b>14</b> , this work |
| Mn6-VIVGOX  | III III | O-ON               | 3.258 | -1.8  | -     | 3                     |
| Mn6-REJPEC  | III III | O-ON               | 3.258 | -6.2  | -     | 3                     |
| Mn4-UFAMAP  | III III | O-ONO <sub>2</sub> | 3.261 | +7.5  | +17.4 | 1                     |
| Mn6-VIVFIQ  | III III | O-ON               | 3.263 | -3.2  | -     | 3                     |
| Mn6-CEYMAV  | III III | O-ON               | 3.264 | +3.2  | -     | 3                     |
| Mn6-VIVGIR  | III III | O-ON               | 3.269 | -4.6  | -     | 3                     |
| Mn6-CIFJUX  | III III | O-ON               | 3.271 | +0.4  | -     | <b>3</b> , this work  |
| Mn6         | III III | O-ON               | 3.273 | +0.6  | -     | <b>14</b> , this work |
| Mn6         | III III | ON-ON              | 3.280 | +7.0  | -     | <b>14</b> , this work |
| Mn6-CEYMAV  | III III | O-ON               | 3.282 | +2.4  | -     | 3                     |
| Mn6-VIVGOX  | III III | O-ON               | 3.282 | -0.04 | -     | 3                     |
| Mn4-FECFOI  | III III | O-C2               | 3.299 | -15.1 | -     | 1                     |
| Mn4-LAQYOS  | III III | O-C2               | 3.299 | -10.1 | -     | 1                     |
| Mn4-KIRNUU  | III III | O-C2               | 3.308 | -12.9 | -     | 1                     |
| Mn4-KIRNUU  | III III | O-C2               | 3.308 | -13.0 | -     | 1                     |
| Mn4-VOFBEX  | III III | O-C2               | 3.308 | -14.0 | -     | 1                     |
| Mn19-XELCUN | III III | O-N <sub>3</sub>   | 3.311 | +3.0  | +9.9  | 4                     |
| Mn4-FECFOI  | III III | O-C2               | 3.311 | -14.3 | -     | 1                     |
| Mn4-VOFBEX  | III III | O-C2               | 3.312 | -13.8 | -     | 1                     |
| Mn4-LAQYOS  | III III | O-C2               | 3.314 | -14.4 | -     | 1                     |
| Mn6-VIVGOX  | III III | ON-ON              | 3.322 | +6.6  | -     | 3                     |
| Mn6-VIVGIR  | III III | ON-ON              | 3.328 | +4.2  | -     | 3                     |
| Mn6-REJPEC  | III III | ON-ON              | 3.337 | +5.8  | -     | 3                     |
| Mn6-CIFJUX  | III III | ON-ON              | 3.341 | +4.2  | -     | <b>3</b> , this work  |
| Mn4-SUXMIH  | III III | O-C                | 3.362 | -9.4  | -     | 1                     |
| Mn4-FECFOI  | III III | O-C                | 3.370 | -15.2 | -     | 1                     |
| Mn4-FECFOI  | III III | O-C                | 3.384 | -16.5 | -     | 1                     |
| Mn4-VOFBEX  | III III | O-C                | 3.387 | -6.0  | -     | 1                     |
| Mn4-KIRNUU  | III III | O-C                | 3.398 | -18.2 | -     | 1                     |
| Mn4-KIRNUU  | III III | O-C                | 3.398 | -18.3 | -     | 1                     |
| Mn4-VOFBEX  | III III | O-C                | 3.407 | -10.9 | -     | 1                     |
| Mn6-VIVGEN  | III III | O-ON               | 3.414 | +1.4  | -     | <b>6</b> , this work  |
| Mn4-LAQYOS  | III III | O-C                | 3.437 | -10.0 | -     | 1                     |
| Mn4-LAQYOS  | III III | O-C2               | 3.451 | -12.9 | -     | 1                     |
| Mn6-VIVGEN  | III III | ON-ON              | 3.461 | +1.6  | -     | <b>6</b> , this work  |
| Mn6-VIVFOW  | III III | OR-ON              | 3.635 | -0.4  | -     | 3                     |
| Mn6-VIVFIQ  | III III | OR-ON              | 3.647 | -1.6  | -     | 3                     |
| Mn6-CIFJUX  | III III | OR-ON              | 3.670 | -0.4  | -     | <b>3</b> , this work  |

|              |         |         |       |        |         |                       |
|--------------|---------|---------|-------|--------|---------|-----------------------|
| Mn6-CIFJUX   | III III | OR-ON   | 3.728 | +1.4   | -       | <b>3</b> , this work  |
| Mn6          | III III | OR-ON   | 3.779 | -1.2   | -       | <b>14</b> , this work |
| Mn6-CEYMAV   | III III | OR-ON   | 3.784 | +1.0   | -       | 3                     |
| Mn6-VIVGIR   | III III | OR-ON   | 3.851 | -1.4   | -       | 3                     |
| Mn6-VIVGOX   | III III | OR-ON   | 3.857 | +0.2   | -       | 3                     |
| Mn6-VIVGEN   | III III | OR-ON   | 3.869 | +3.4   | -       | <b>6</b> , this work  |
| Mn6-REJPEC   | III III | OR-ON   | 4.362 | -1.0   | -       | 3                     |
| Mn2-VOWCEP   | IV IV   | O-O-OH  | 2.265 | -684.0 | -998.0  | 2                     |
| Mn2-VADDAF   | IV IV   | O-O-O   | 2.307 | -779.0 | -1012.0 | 2                     |
| Mn2-HAJZOH01 | IV IV   | O-O-C   | 2.640 | -29.0  | -127.1  | 2                     |
| Mn3-IGOJET   | IV IV   | O-O-C   | 2.660 | -22.4  | -98.5   | 1                     |
| Mn3-IGOJET   | IV IV   | O-O-C   | 2.667 | -22.4  | -90.6   | 1                     |
| Mn3-JEBXUJ   | IV IV   | O-O     | 2.681 | -107.5 | -203.8  | 1                     |
| Mn2-BEPVIC   | IV IV   | O-O     | 2.701 | -134.0 | -258.0  | 2                     |
| Mn2-HISGOF   | IV IV   | O-O     | 2.722 | -168.0 | -322.0  | 2                     |
| Mn4-LIDVUP   | IV IV   | O-O     | 2.735 | -141.0 | -259.0  | 1                     |
| Mn4-LIDVUP   | IV IV   | O-O     | 2.746 | -104.0 | -210.0  | 1                     |
| Mn4-LIDVUP   | IV IV   | O-O     | 2.760 | -111.0 | -216.0  | 1                     |
| Mn12-RAHBIM  | IV IV   | O-O     | 2.820 | +2.8   | +5.4    | 6                     |
| Mn12-RAHBIM  | IV IV   | O-O     | 2.928 | -10.0  | -16.0   | 6                     |
| Mn3-JEBXUJ   | IV IV   | O       | 3.241 | -56.8  | -138.6  | 1                     |
| Mn3-JEBXUJ   | IV IV   | O       | 3.245 | -55.3  | -135.4  | 1                     |
| Mn12-RAHBIM  | II III  | OR-OR-C | 3.149 | -7.2   | -16.3   | 6                     |
| Mn12-RAHBIM  | II III  | OR-OR-C | 3.169 | +4.5   | +6.4    | 6                     |
| Mn2-GAVWOP   | II III  | OR-OR   | 3.181 | +1.0   | -8.5    | 2                     |
| Mn12-RAHBIM  | II III  | OR-OR-C | 3.183 | +5.1   | +8.1    | 6                     |
| Mn12-RAHBIM  | II III  | OR-OR-C | 3.183 | +5.1   | +8.1    | 6                     |
| Mn12-RAHBIM  | II III  | OR-OR-C | 3.198 | -2.8   | -8.4    | 6                     |
| Mn12-RAHBIM  | II III  | OR-OR-C | 3.206 | -4.4   | -12.1   | 6                     |
| Mn19-XELCUN  | II III  | O-OR    | 3.224 | +1.6   | +5.1    | 4                     |
| Mn10-VEHQEF  | II III  | O-OR    | 3.267 | +1.6   | +3.7    | 4                     |
| Mn19-XELCUN  | II III  | O-OR    | 3.298 | +3.4   | +7.2    | 4                     |
| Mn19-XELCUN  | II III  | O-OR    | 3.303 | +5.4   | +7.2    | 4                     |
| Mn19-XELCUN  | II III  | O-OR    | 3.436 | +1.9   | +3.6    | 4                     |
| Mn12-RAHBIM  | II III  | OR-C-C  | 3.473 | -7.3   | -1.8    | 6                     |
| Mn4-SAVRIR   | II III  | O       | 3.735 | -10.7  | -14.1   | 1                     |
| Mn4-SAVROX   | II III  | O       | 3.787 | -8.6   | -10.9   | 1                     |
| Mn2-QABHAC   | III IV  | O-O-C   | 2.553 | -277.0 | -517.0  | 2                     |
| Mn2-QABHAC   | III IV  | O-O-C   | 2.633 | -197.0 | -348.0  | 2                     |
| Mn12-RAHBIM  | III IV  | O-O-C   | 2.769 | -53.9  | -75.6   | 6                     |
| Mn4-UFAMAP   | III IV  | O-O-C   | 2.775 | -38.7  | -47.4   | 1                     |

|             |        |       |       |       |       |   |
|-------------|--------|-------|-------|-------|-------|---|
| Mn4-VALRUV  | III IV | O-O-C | 2.787 | -52.5 | -74.3 | 1 |
| Mn4-VALRUV  | III IV | O-O-C | 2.788 | -51.8 | -64.2 | 1 |
| Mn4-UFAMAP  | III IV | O-O-C | 2.790 | -39.5 | -50.3 | 1 |
| Mn4-ZALSUA  | III IV | O-O-C | 2.791 | -45.9 | -52.4 | 1 |
| Mn4-VALRUV  | III IV | O-O-C | 2.792 | -56.0 | -69.2 | 1 |
| Mn4-ZALSUA  | III IV | O-O-C | 2.794 | -44.1 | -52.3 | 1 |
| Mn4-UFAMAP  | III IV | O-O-C | 2.798 | -37.5 | -44.8 | 1 |
| Mn4-ZALSUA  | III IV | O-O-C | 2.812 | -45.0 | -62.9 | 1 |
| Mn12-RAHBIM | III IV | O-C   | 3.328 | -3.8  | -2.7  | 6 |
| Mn12-RAHBIM | III IV | O-C   | 3.417 | -3.8  | -2.7  | 6 |
| Mn12-RAHBIM | III IV | O     | 3.450 | -26.7 | -49.8 | 6 |

C = carboxilate

1 To be submitted

2 To be submitted

3 E. Cremades, J. Cano, E. Ruiz, G. Rajaraman, C. J. Milios, E. K. Brechin, submitted to publication.

4 E. Ruiz, T. Cauchy, J. Cano, R. Costa, J. Tercero, and S. Alvarez, *J. Am. Chem. Soc.*, 2008, **130**, 7420.

5 J. Cano, T. Cauchy, E. Ruiz, C. J. Milios, C. C. Stoumpos, T. C. Stamatatos, S. P. Perlepes, G. Christou, and E. K. Brechin, *Dalton Trans.*, 2008, 234.

6 J. Cano, R. Costa, S. Alvarez, and E. Ruiz, *J. Chem. Theory Comput.*, 2007, **3**, 782.
